# Supplementary material for: Goldcore–polyanilineshell composite nanowires as a substrate for surface enhanced Raman scattering and catalyst for dye reduction
Source: Royal Society of Chemistry journal article supplement (doi:10.1039/c4nj01521e), 2014-11-07
Supplement: c4nj01521e1.pdf [file c4nj01521e1.pdf]

*Electronic supplementary information for*

**Gold<sub>core</sub> - Polyaniline<sub>shell</sub> composite nanowires as substrate for surface enhanced Raman scattering and catalyst for dye reduction**

Sunil Dutt<sup>1</sup>, Prem Felix Siril<sup>1\*</sup>, Vipul Sharma<sup>1</sup> and Selvakannan Periasamy<sup>2</sup>

<sup>1</sup>School of Basic Sciences, Indian Institute of Technology Mandi  
Mandi -175 001, Himachal Pradesh, India.

<sup>2</sup>Center for Advanced Materials and Industrial Chemistry,  
School of Applied Sciences, RMIT University, Australia

\*Email: [prem@iitmandi.ac.in](mailto:prem@iitmandi.ac.in), Tel. no: +91-1905300040, Fax: +91-1905237942

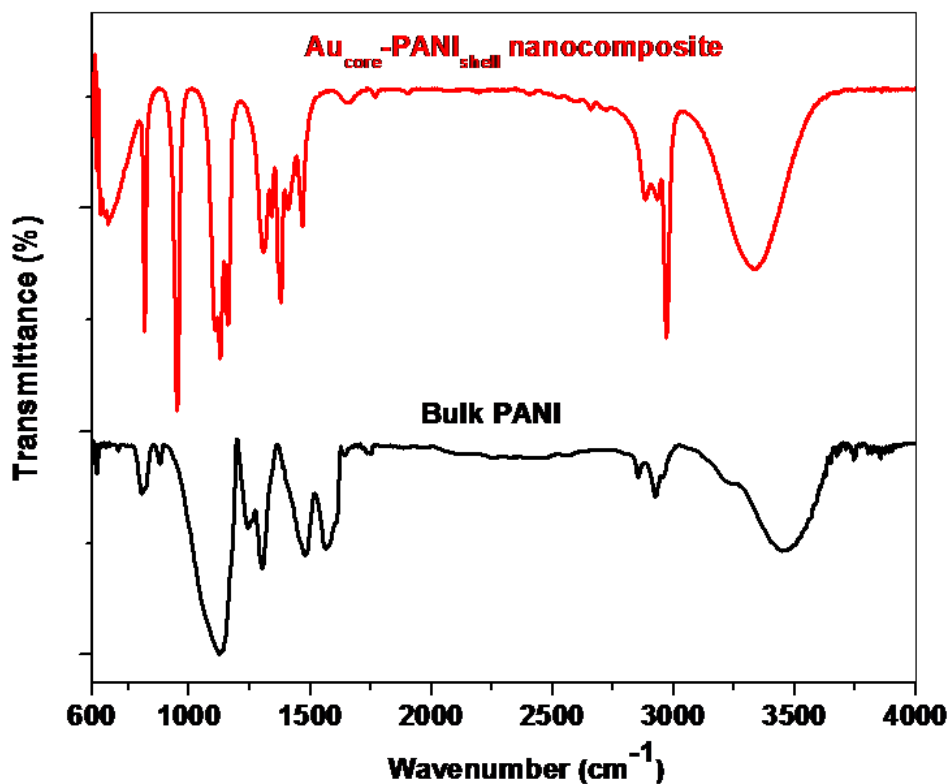

**Fig. S1:** FTIR spectra of Bulk PANI and Au<sub>core</sub> - PANI<sub>shell</sub> nanocomposite in KBr Pellets.

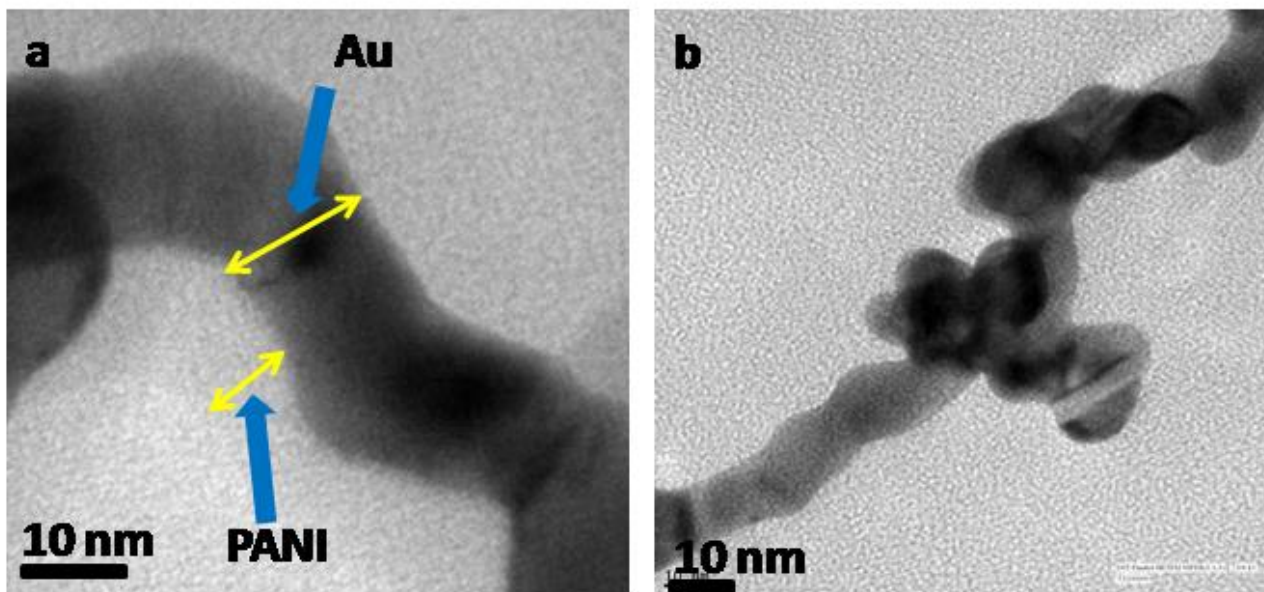

Fig. S2. HR-TEM Images

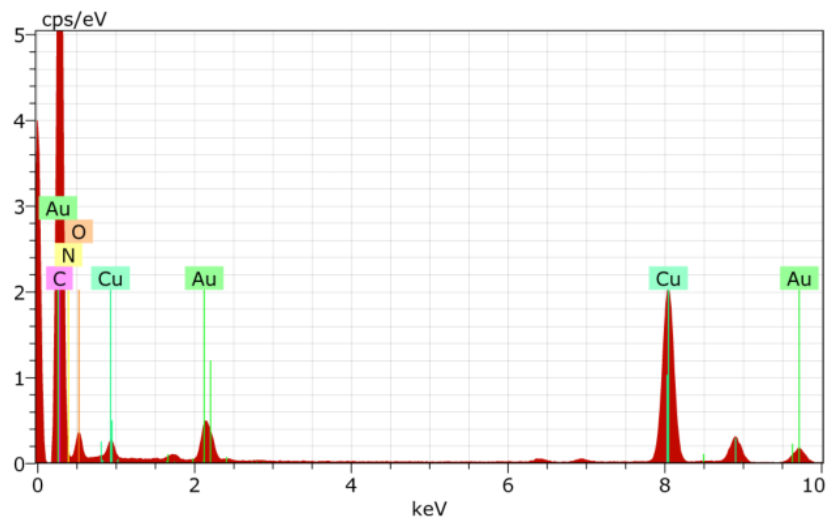

Fig. S3. EDX spectrum of sample deposited on TEM grid.

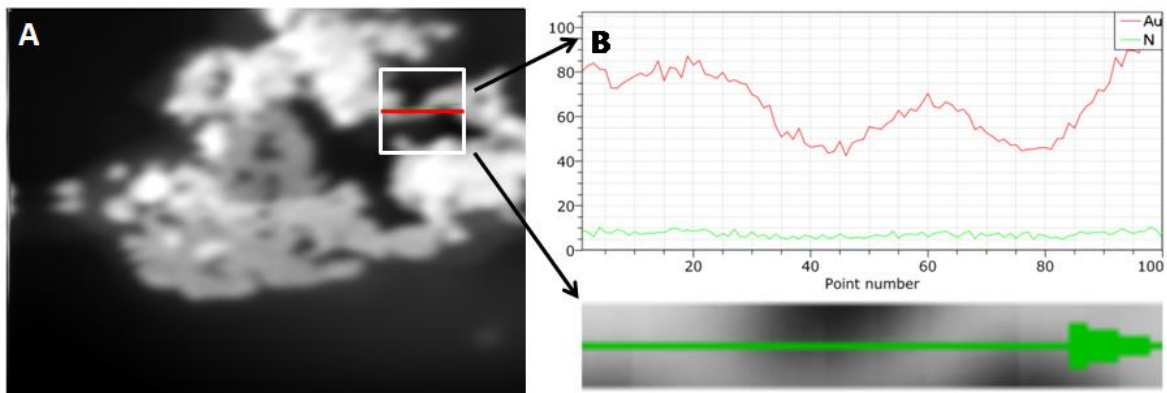

**Fig. S4.** (A) STEM image of Au<sub>core</sub> - PANI<sub>shell</sub> nanocomposite (B) EDS line scan spectra of marked nanowire

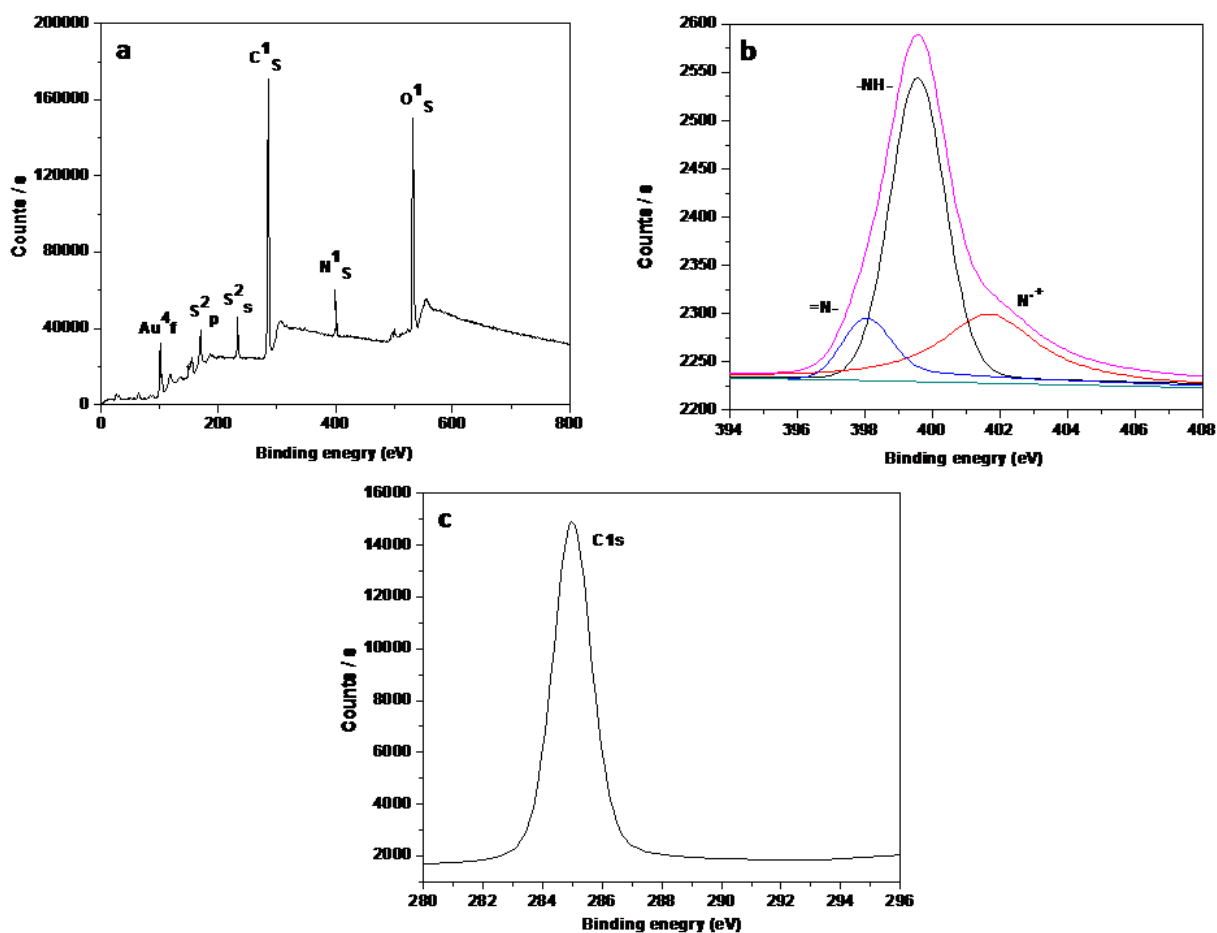

**Fig. S5.** (a) XPS full survey of Au<sub>core</sub> - PANI<sub>shell</sub> nanocomposite (b) Core level N<sup>1s</sup> spectrum (c) Core level C<sup>1s</sup> spectrum.

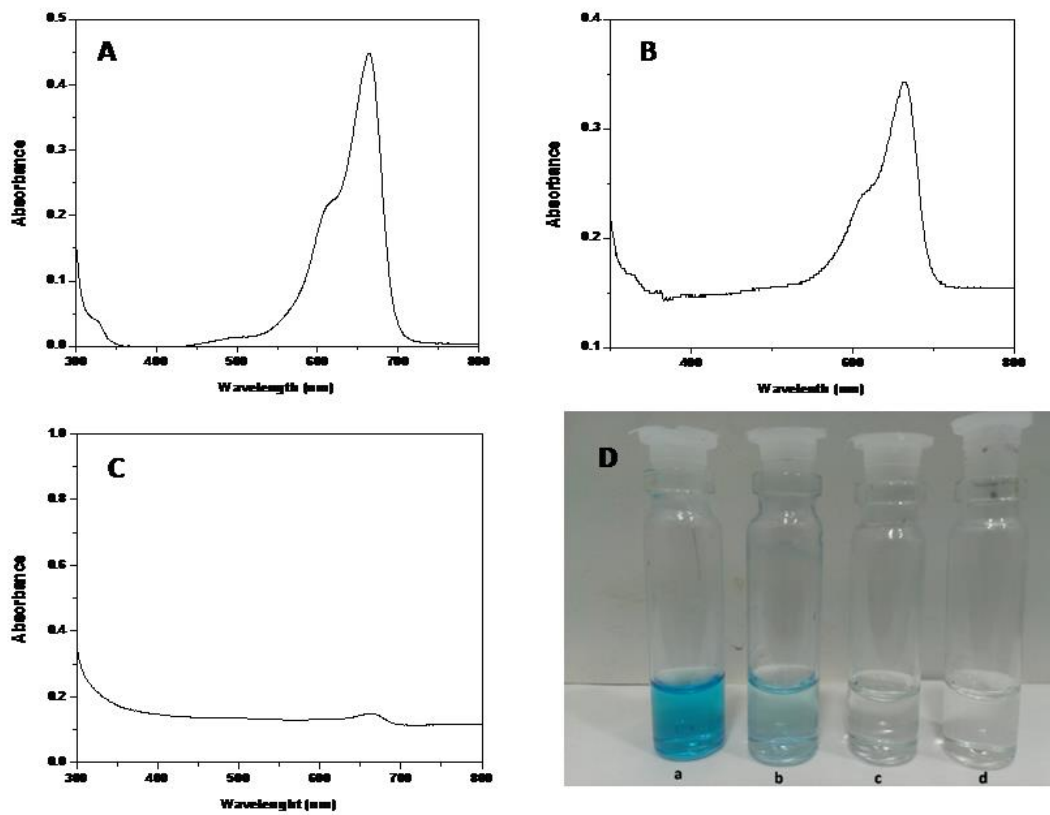

**Fig. S6.** UV-vis spectra of (A) MB ( $1 \times 10^{-5} \text{ M}$ ) (B) Supernatant of Au<sub>core</sub>-PANI<sub>shell</sub> nanocomposite after dye adsorption (C) Supernatant of bulk-PANI after dye adsorption (D) Pictures of (a) pure MB dye ( $1 \times 10^{-5} \text{ M}$ ) (b) supernatant after dye adsorption on Au<sub>core</sub>-PANI<sub>shell</sub> nanocomposite (c,d) supernatant after dye adsorption on bulk-PANI under normal conditions and under dark conditions respectively.

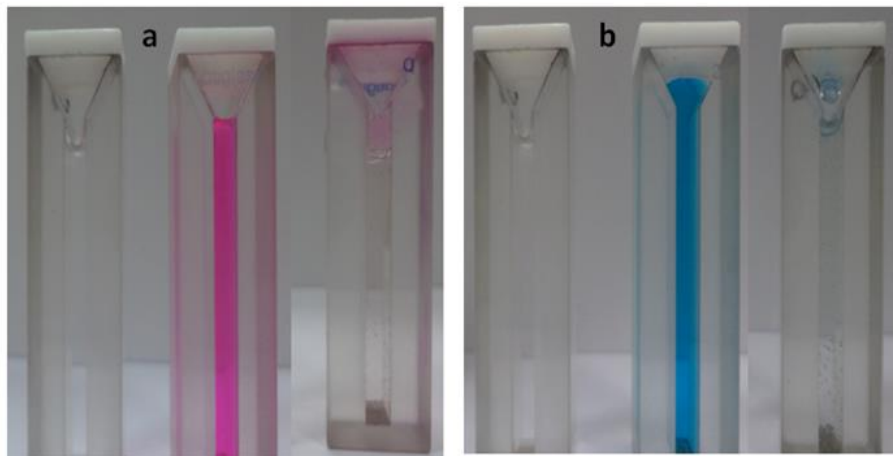

**Fig. S7.** Photographs of UV cuvettes containing (a) water(left), Rh B dye (middle) and reduced Rh B dye (right) (b) water (left), MB dye (middle) and reduced MB dye (right).

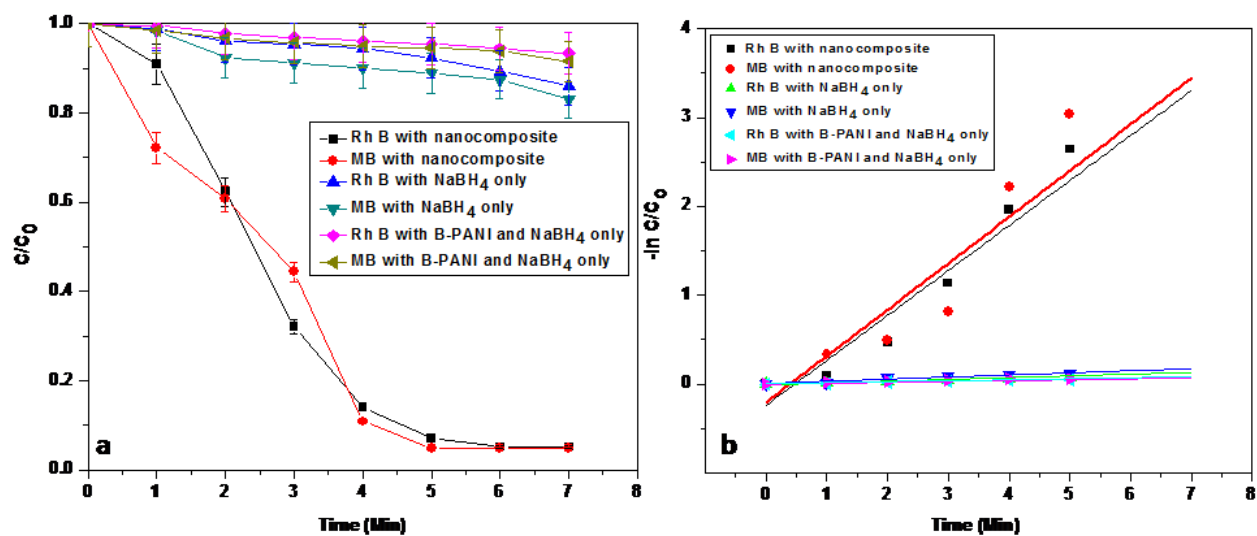

**Fig. S8.** (a) The kinetic curve of reductive degradation of MB and Rh B dyes under different conditions (b) plot of  $-\ln(C/C_0)$  versus reaction time for reductive degradation of MB and Rh B dyes under different conditions. The concentrations of Rh B, MB and NaBH<sub>4</sub> were kept constant in all cases.
